# Supplementary material
Source: PubMed Central journal article supplement (PMC7755675)
Supplement: NIHMS1633858-supplement-1.pdf [file NIHMS1633858-supplement-1.pdf]

## Supplemental Figure Legends

### **Figure S1.** Evidence of advanced intestinalized SPEM in stomachs of gastritis-prone

SAMP mice. (A) Representative histologic image of 4-wk-old SAMP shows early hyperproliferation of gastric glands compared to age-matched AKR (*left panels*), while in 20-wk-old SAMP, Alcian blue/PAS staining highlights acidic mucin-secreting cells (*arrows*) replacing parietal (*arrowheads*) and chief cells as SPEM progresses, which is absent in age-matched AKR (*right panels*). Original magnification: X20+1.25; scale bars: 100 $\mu$ m (N=6-8). (B) Representative IF images of full-thickness corpus from 4-wk-old SAMP display early, aberrant staining of GSII (green) and Clu (red), characteristic of SPEM (*left lower panels*) compared to age-matched AKR (*left upper panels*) that becomes more evident in 20-wk-old SAMP with established gastritis, with clear abundance of GSII<sup>+</sup> cells and increased CD44v and Clu (both red), localizing to base of gastric glands (*arrows, right lower panels*) when compared to age-matched AKR controls (*right upper panels*). Original magnification: X20; scale bars: 100 $\mu$ m.

### **Figure S2.** Molecular profiling indicates advanced SPEM in SAMP corpus that

progresses with age. Relative expression of (A) *Gif*, *Atp4a*, *Tff1*, (B) *Tff2*, *Mist1*, (C) *He4*, *Clu*, *Lyz*, *Gpx2*, and (D) *Cftr*, *Dmbt1*, *Etv5* in young SAMP vs. SAMP with established disease and vs. age-matched AKR controls. Data is expressed as fold-change vs. 4-wk-old AKR (with mean arbitrarily set as 1); \* $P$ <0.05, \*\* $P$ <0.01, \*\*\* $P$ <0.001 vs. age-matched AKR, and ## $P$ <0.01, ### $P$ <0.001 vs. 4-wk-old AKR/SAMP (N=6-9).

**Figure S3.** Increased circulating levels of IL-33 in SAMP mice. Serum levels of total IL-33 protein in 4-, 10- and 20-wk-old SAMP vs. age-matched control AKR; \* $P < 0.05$ , \*\*\* $P < 0.001$  vs. age-matched AKR. # $P < 0.05$  vs. 4-wk-old SAMP (N=3-6).

**Figure S4.** Gating strategy for distinguishing M1 vs. M2 macrophages by flow cytometry. Representative 2D dot plots (shown here for BM) for SAMP depict, from left to right: 1) SSC vs. FSC (gating on general cells), 2) FSC-A vs. FSC-H (gating on singlets), 3) SSC-A vs. live/dead (gating on live cells), 4) CD11b vs. SSC-A (gating on granulocytes), 5) Ly6G vs. SSC-A (gating on Ly6G<sup>-</sup> cells), 6) CD163 vs. F4/80 (gating on macrophages, Mph), 7) TNF vs. MHCII (gating on M1 macrophages), and Arg1 vs. CD163 (gating on M2 macrophages).

**Figure S5.** Strong prominence of M2- vs. M1-associated gene markers expressed in macrophages from SAMP vs. AKR mice. Relative transcript levels of M1- vs. M2-associated molecules (defined in Sica and Mantovani, Trends Immunol 2002 and Murray, Immunity 2017) in isolated macrophages from 10-wk-old SAMP, normalized by *36B4* and expressed as % fold-change of age-matched AKR controls. Data is presented as mean $\pm$ SD (N=6).

**Figure S6.** Gating strategy for detecting eosinophils by flow cytometry. Representative 2D dot plots (shown here for BM) for control AKR depict, from left to right: 1) SSC vs. FSC (P1, gating on general cells), 2) FSC-A vs. FSC-H (P2, gating on singlets), 3) SSC-A vs. live/dead (gating on live cells), and 4) CD11b vs. Siglec-F (gating on EOS).

**Figure S7.** Eosinophil depletion is effective in decreasing peripheral (BM) and local (gastric) eosinophils, and reduces M2 macrophages and expression of M2-associated genes in SAMP stomachs. (A) Frequency of peripheral (BM)-derived eosinophils (*left panel*) and eosinophil count (*right panel*), (B) M2 macrophage frequency (*left panel*), and M2 macrophage count (*right panel*, defined as IL-33<sup>+</sup>CD163<sup>+</sup> cells shown in **Fig. 6A**, middle panels) in SAMP corpus after eosinophil depletion by administration of anti-IL-5 and anti-CCR3, alone and in combination, vs. IgG-treated controls (N=4-9). (C) Relative transcript levels of M2-associated molecules, normalized by *36B4* and expressed as fold-change vs. IgG-treated controls (with mean set arbitrarily as 1) (N=6), and (D) representative IHC images localizing IL-33 (N=4). Original magnification: X10+1.25; scale bars: 100µm. \**P*<0.05, \*\**P*<0.01, \*\*\**P*<0.001, \*\*\*\**P*<0.0001.

**Figure S8.** Evidence that aberrant adaptive immune responses, and not increased ILC2 frequency, is essential for development of gastritis/SPEM in SAMP mice. Corpus tissues were excised from stomachs of SAMP and AKR, processed into single-cell suspensions for flow cytometric analysis of ILC2s using the following gating strategy: (A) live cells were gated on CD45<sup>+</sup>, then on CD127<sup>+</sup> cells negative for lineage markers CD3 (T cells), CD11c (DCs), B220 (B cells), CD11b (myeloid cells), Ly6g, Ter-119 (granulocytes), and positive for the transcription factor, GATA3, (B) with ILC2s reported as both percentages and absolute numbers; \**P*<0.05, \*\**P*<0.01 (N=3-7). (C) Epithelial hyperplasia (*left panels*) and total inflammation (*right panels*) in corpus from SAMP x RAG2<sup>-/-</sup> mice vs. WT controls; \**P*<0.05, \*\**P*<0.01, \*\*\**P*<0.001 (N=7-15).

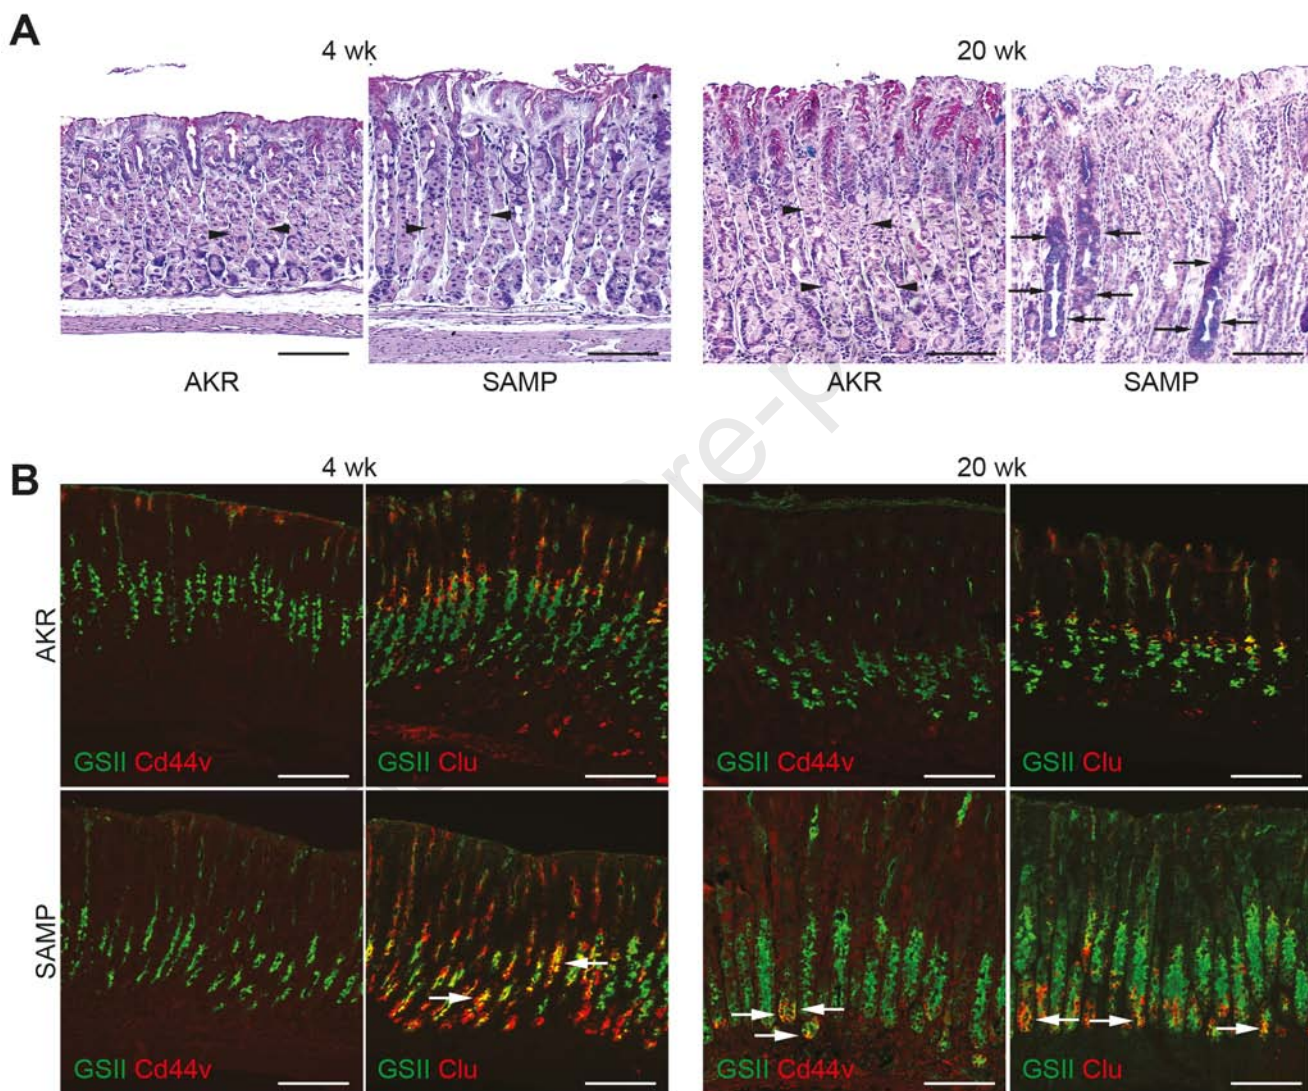

**Supplemental Figure 1**

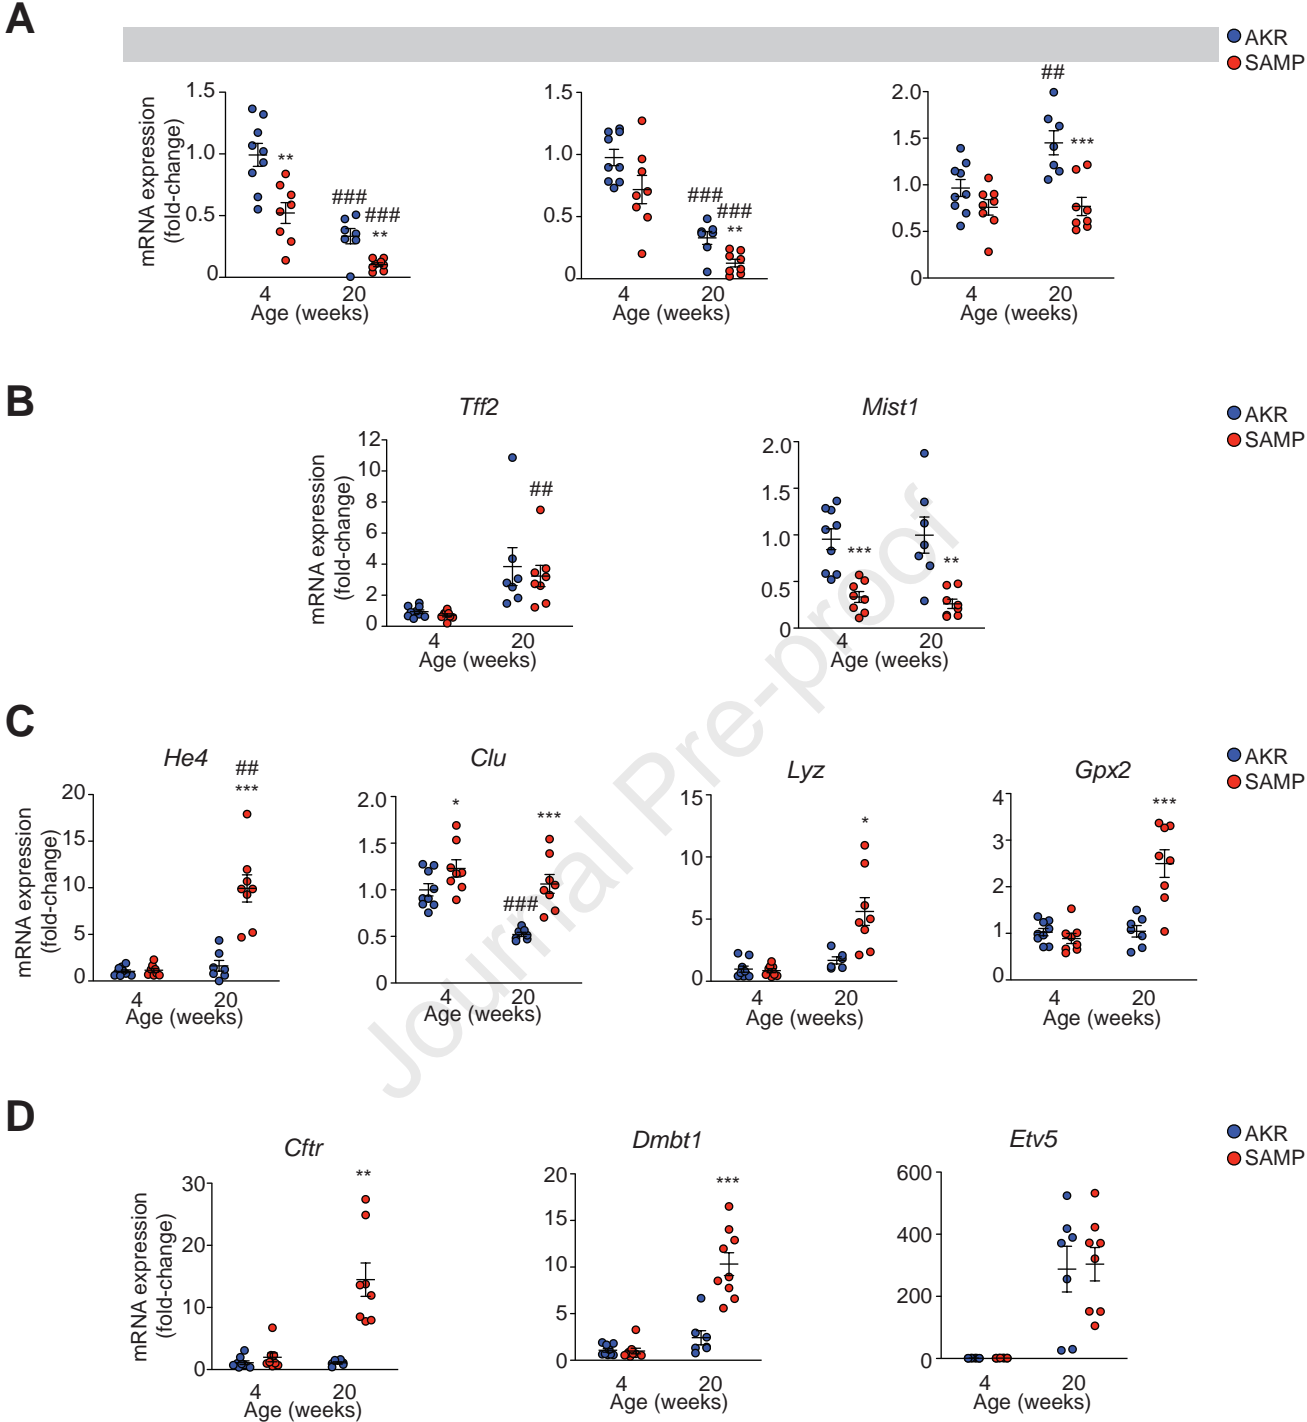

**Supplemental Figure 2**

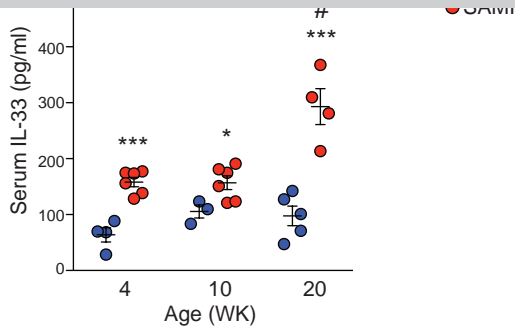

**Supplemental Figure 3**

Journal Pre-proof

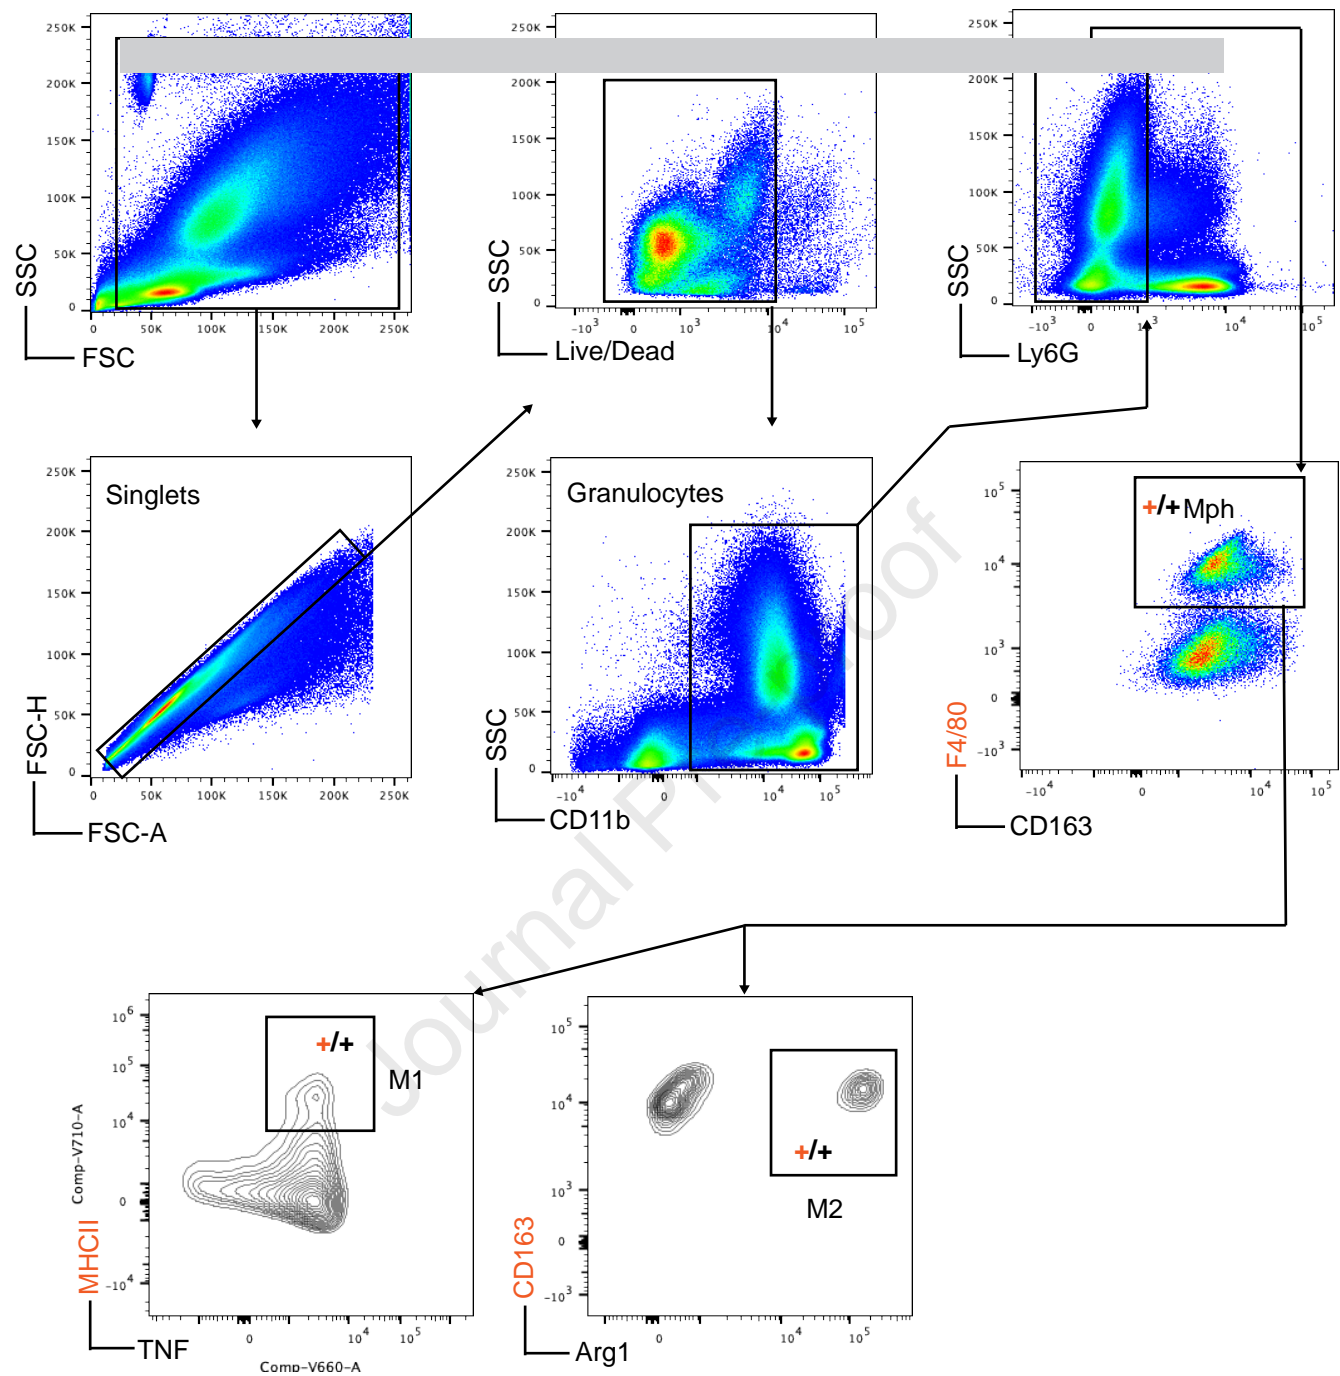

**Supplemental Figure 4**

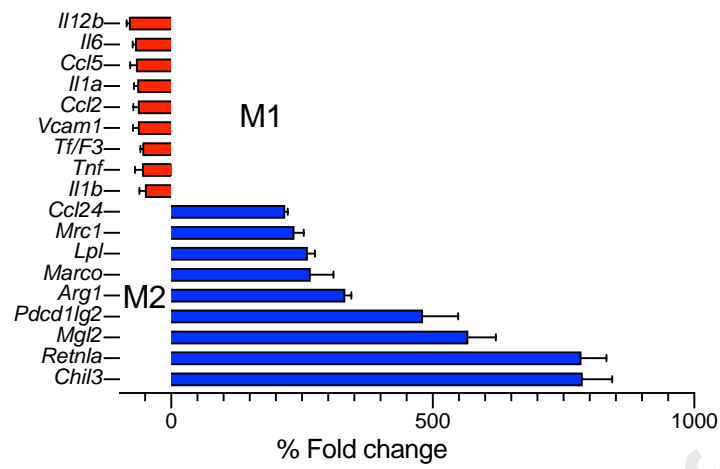

Supplemental Figure 5

Journal Pre-proof



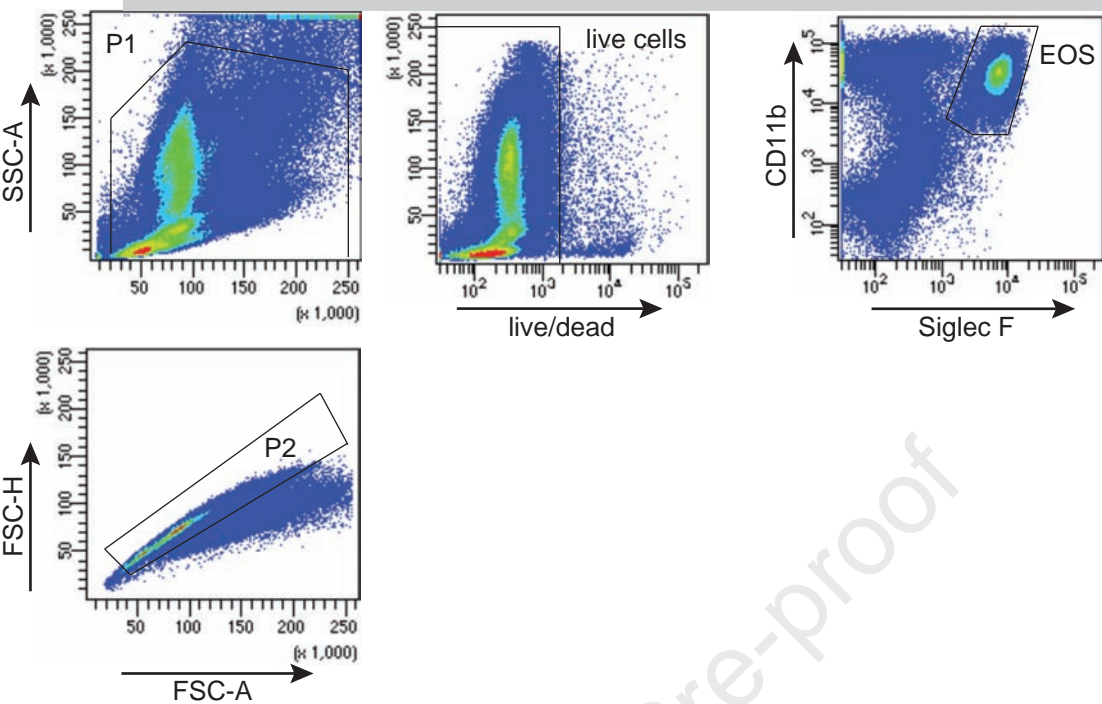

Supplemental Figure 6

Journal Pre-proof

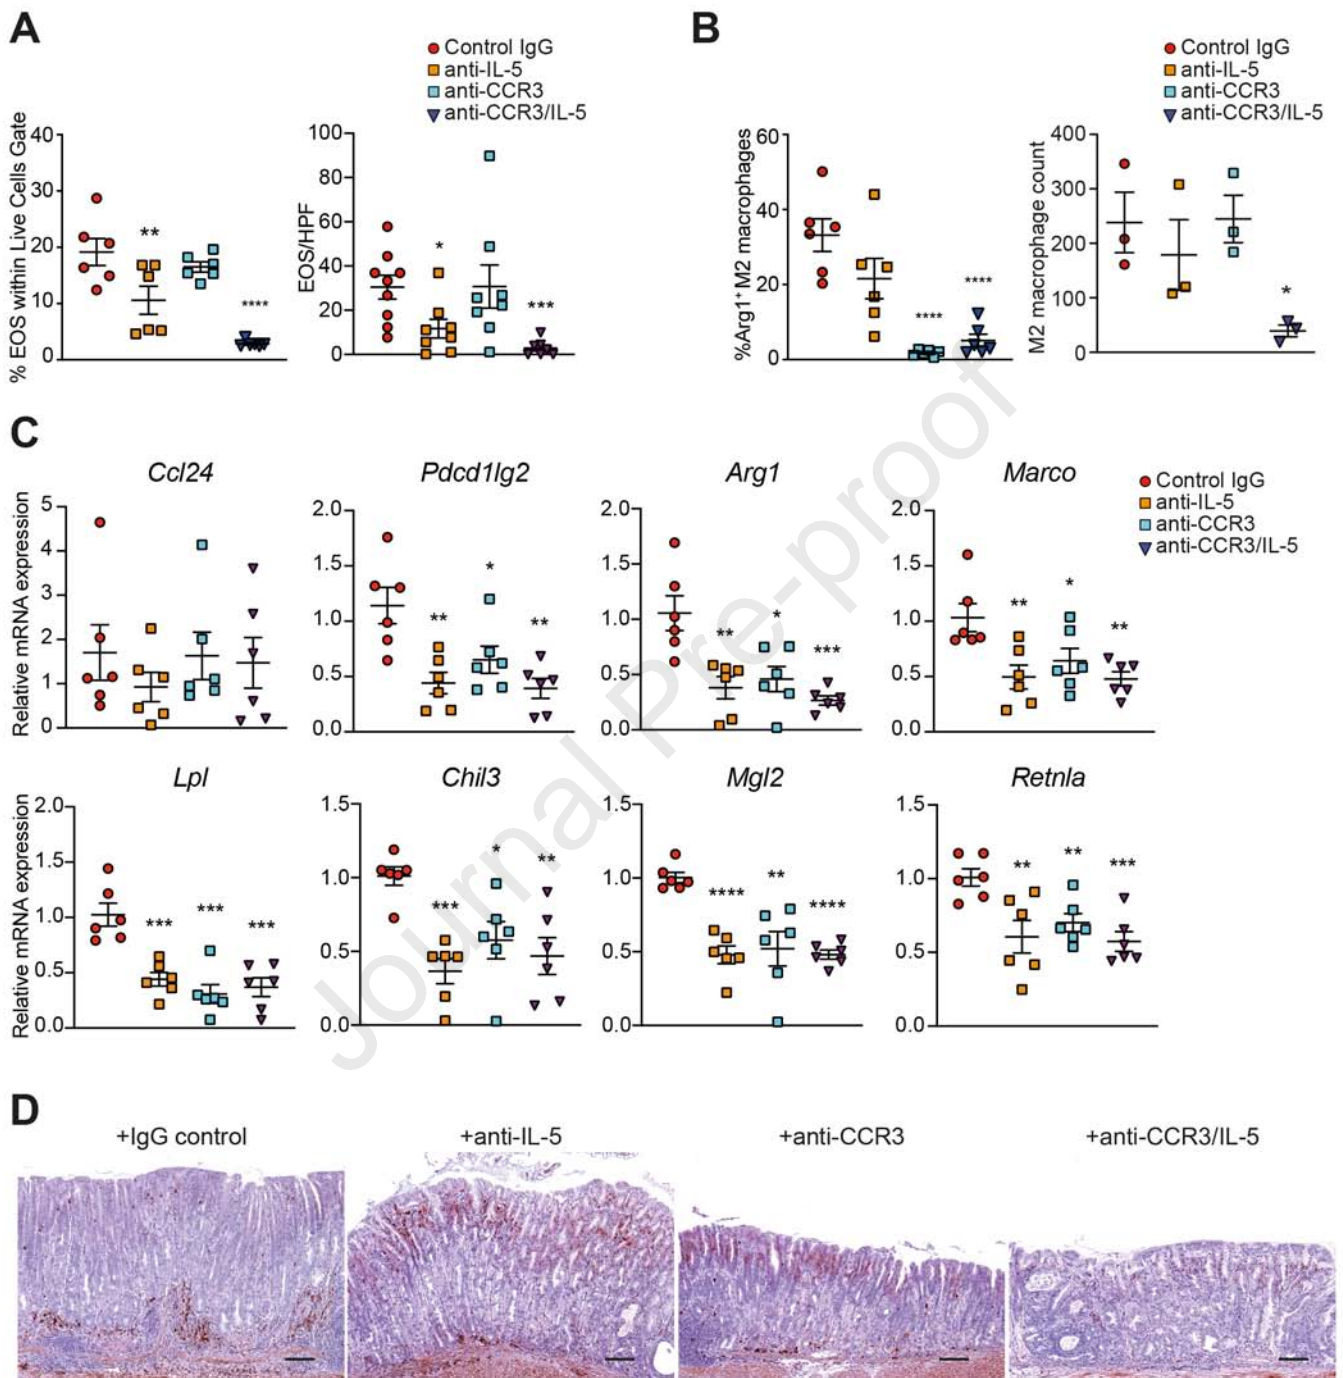

**Supplemental Figure 7**

**A**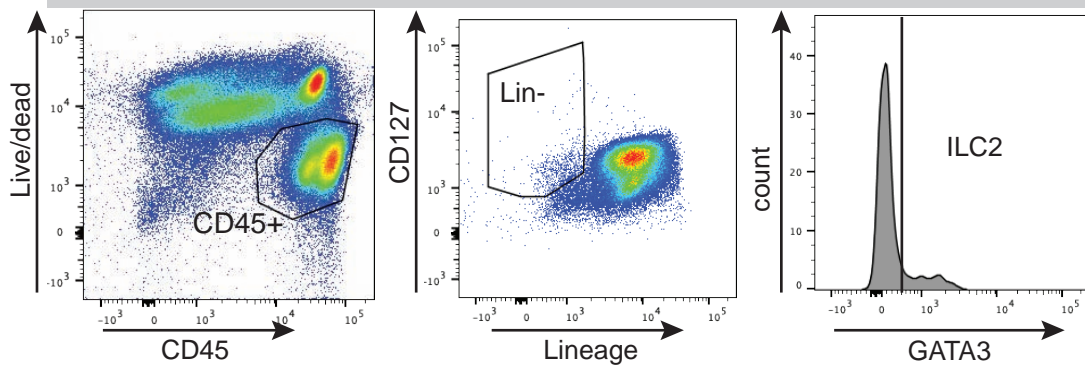**B**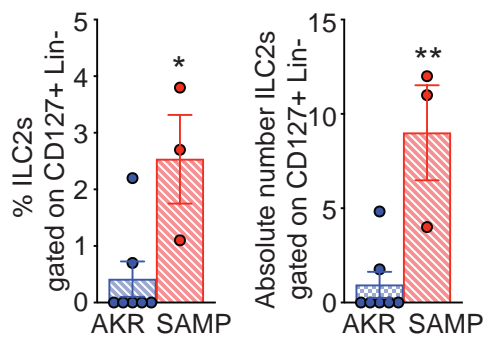**C**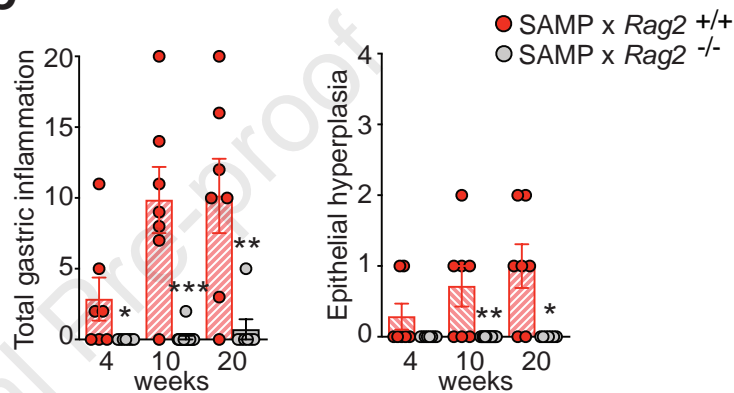

Supplemental Figure 8

**Supplemental Table 1. Primer sequences for qPCR analyses**

| <b>Target</b>       | <b>Sequence fwd</b>             | <b>Sequence rev</b>              |
|---------------------|---------------------------------|----------------------------------|
| <i>Actinb</i>       | 5'-CAGGGTGTGATGGTGGGAATG-3'     | 5'-GTAGAAGGTGTGGTGCCAGATC-3'     |
| <i>Tff1</i>         | 5'-AGCACAAGGTGATCTGTGTCC-3'     | 5'-GGAAGCCACAATTTATCCTCTCC-3'    |
| <i>Tff2</i>         | 5'-TGCTCTGGTAGAGGGCGAG-3'       | 5'-CGACGCTAGAGTCAAAGCAG-3'       |
| <i>Mist1</i>        | 5'-TGGTGGCTAAAGCTACGTGTC-3'     | 5'-GACTGGGGTCTGTGAGGTGT-3'       |
| <i>Atp4a</i>        | 5'-TCTGCTTTGCGGGACTTGTA-3'      | 5'-CGGCATTTGAGCACAGCAT-3'        |
| <i>Lyz</i>          | 5'-GAGACCGAAGCACCGACTATG-3'     | 5'-CGGTTTTGACATTGTGTTCCG-3'      |
| <i>Gif</i>          | 5'-CCCTCTACCTCCTAAGTGTTC-3'     | 5'-CTGAGTCAGTCACCGAGTTC-3'       |
| <i>He4</i>          | 5'-AACCAATTACGGACTGTGTGTT-3'    | 5'-TCGCTCGGTCCATTAGGCT-3'        |
| <i>Dmbt1</i>        | 5'-ACCTCCTCACGGTGCTACAG-3'      | 5'-GCTTCTTCACATCCTCCACTG-3'      |
| <i>Cftr</i>         | 5'-CTGGACCACACCAATTTTGAGG-3'    | 5'-GCGTGGATAAGCTGGGGAT-3'        |
| <i>Gpx2</i>         | 5'-CAGGGCTGTGCTGATTGAG-3'       | 5'-CGGACATACTTGAGGCTGTTCC-3'     |
| <i>Clu</i>          | 5'-CCAGCCTTTCTTTGAGATGA-3'      | 5'-CTCCTGGCACTTTTCACACT-3'       |
| <i>Etv5</i>         | 5'-GCTCTTGGTGCTAAGTAGGA-3'      | 5'-TCTGATGGGTGGGTGACA-3'         |
| <i>Il33</i>         | 5'-TCCTTGCTTGGCAGTATCCA-3'      | 5'-TGCTCAATGTGTCAACAGACG-3'      |
| <i>Il1rl1(ST2L)</i> | 5'-TGCGTACATCATTTACCCTCGGGTC-3' | 5'-TCTTGTGCCACAAGAGTGAAGTAGG-3'  |
| <i>Il1rl1(sST2)</i> | 5'-ACGCTCGACTTATCCTGTGG-3'      | 5'-CAGGTCAATTGTTGGACACG-3'       |
| <i>Ccl24</i>        | 5'-ATTCTGTGACCATCCCCTCAT-3'     | 5'-TGTATGTGCCTCTGAACCCAC-3'      |
| <i>Pdcd1lg2</i>     | 5'-TGTGCTGCCTTTTCTGTGTC-3'      | 5'-GCAGCATGGTCTGTGTCAAT-3'       |
| <i>Arg1</i>         | 5'-TTTTAGGGTTACGGCCGGTG-3'      | 5'-CCTCGAGGCTGTCCTTTTGA-3'       |
| <i>Marco</i>        | 5'-GCACTGCTGCTGATTCAAGTTC-3'    | 5'-AGTTGCTCCTGGCTGGTATG-3'       |
| <i>Lpl</i>          | 5'-GTGGCCGAGAGCGAGAAC-3'        | 5'-AAGAAGGAGTAGGTTTTATTTGTGGA-3' |
| <i>Chil3</i>        | 5'-CAGGTCTGGCAATTCTTCTGAA-3'    | 5'-GTCTTGCTCATGTGTGTAAGTGA-3'    |
| <i>Mgl2</i>         | 5'-TTAGCCAATGTGCTTAGCTGG-3'     | 5'-GGCCTCCAATTCTTGAAACCT-3'      |
| <i>Retnla</i>       | 5'-CCCTCCACTGTAACGAAGACTC-3'    | 5'-CACACCAGTAGCAGTCATCC-3'       |
| <i>Mrc1</i>         | 5'-GGACGAGCAGGTGCAGTT-3'        | 5'-CAACACATCCCGCCTTTC-3'         |
| <i>Il1a</i>         | 5'-GCACCTTACACCTACCAGAGT-3'     | 5'-AAACTTCTGCCTGACGAGCTT-3'      |
| <i>Il1b</i>         | 5'-GCAACTGTTTCTGAACTCAACT-3'    | 5'-ATCTTTTGGGGTCCGTCAACT-3'      |
| <i>Tnf</i>          | 5'-CCCTCACACTCAGATCATCTTCT-3'   | 5'-GCTACGACGTGGGCTACAG-3'        |
| <i>Vcam1</i>        | 5'-ACGTCAGAACAACCGAATCC-3'      | 5'-GTGGTGCTGTGACAATGACC-3'       |
| <i>Il12b</i>        | 5'-TGGTTTGCCATCGTTTTGCTG-3'     | 5'-ACAGGTGAGGTTCACTGTTTCT-3'     |
| <i>Il6</i>          | 5'-TAGTCCTTCTACCCCAATTTCC-3'    | 5'-TTGGTCTTAGCCACTCCTTC-3'       |
| <i>Ccl5</i>         | 5'-GCTGCTTTGCCTACCTCTCC-3'      | 5'-TCGAGTGACAAACACGACTGC-3'      |
| <i>Ccl2</i>         | 5'-TTAAAAACCTGGATCGGAACCAA-3'   | 5'-GCATTAGCTTCAGATTTACGGGT-3'    |
| <i>Tf/F3</i>        | 5'-CCGAGCAATGGAAGAGTTTC-3'      | 5'-CGCTTGACAGAGATATGGA-3'        |
| <i>36B4</i>         | 5'-GCTCCAAGCAGATGCAGCA-3'       | 5'-CCGGATGTGAGGCAGCAG-3'         |

**Supplemental Table 2.** *Antibodies utilized for flow cytometry*

| <b>Antigen</b> | <b>Label</b> | <b>Catalog #</b> | <b>Source</b>                   |
|----------------|--------------|------------------|---------------------------------|
| CD11c          | PECy7        | 561241           | BD Biosciences,<br>San Jose, CA |
| CD11b          | PE-CF594     | 562287           | BD Biosciences                  |
| F4/80          | Alexa-488    | 564227           | BD Biosciences                  |
| Ly6G           | BUV396       | 563978           | BD Biosciences                  |
| Siglec F       | BV610        | 740280           | BD Biosciences                  |
| MHCII          | BV711        | 563414           | BD Biosciences                  |
| Arginase 1     | APC          | 17-3697-82       | ThermoFisher, Waltham, MA       |
| TNF            | BV650        | 563943           | BD Biosciences                  |
| CD163          | BV421        | 155309           | Biolegend, San Diego, CA        |
| IL33           | PE           | MA5-23640        | ThermoFisher                    |
